# Supplementary material for: CUT&RUNTools: a flexible pipeline for CUT&RUN processing and footprint analysis
Source: bioRxiv or medRxiv preprint supplement (doi:10.1101/529081), 2019-01-23
Supplement: Supplementary file [file media-1.pdf]

# Supplementary Fig 1

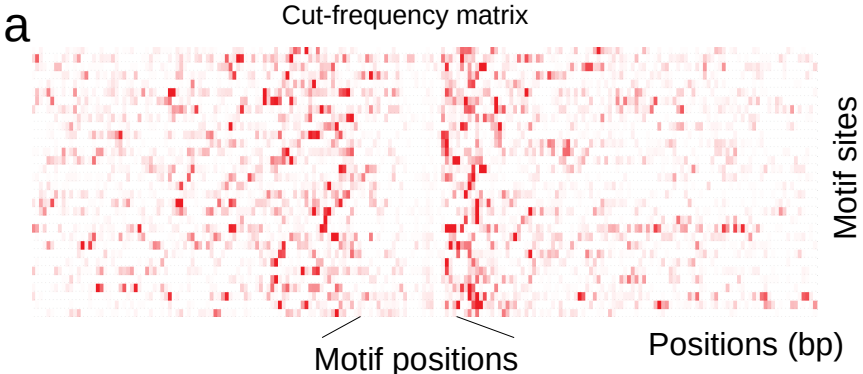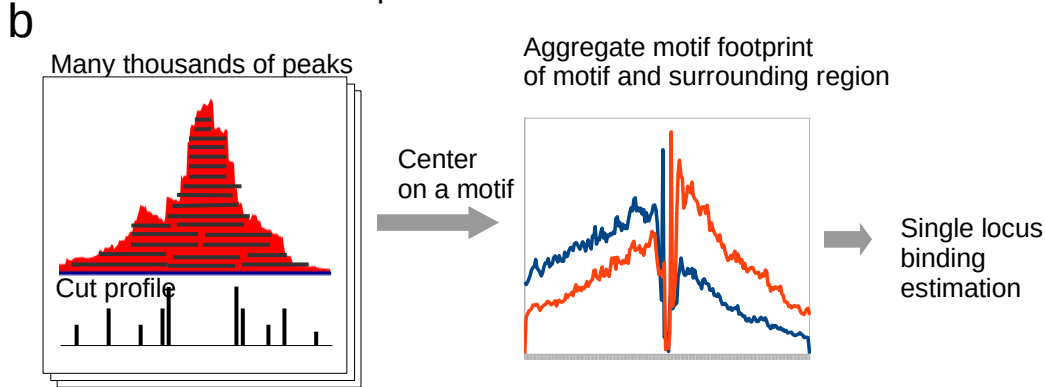

# Supplementary Fig 2

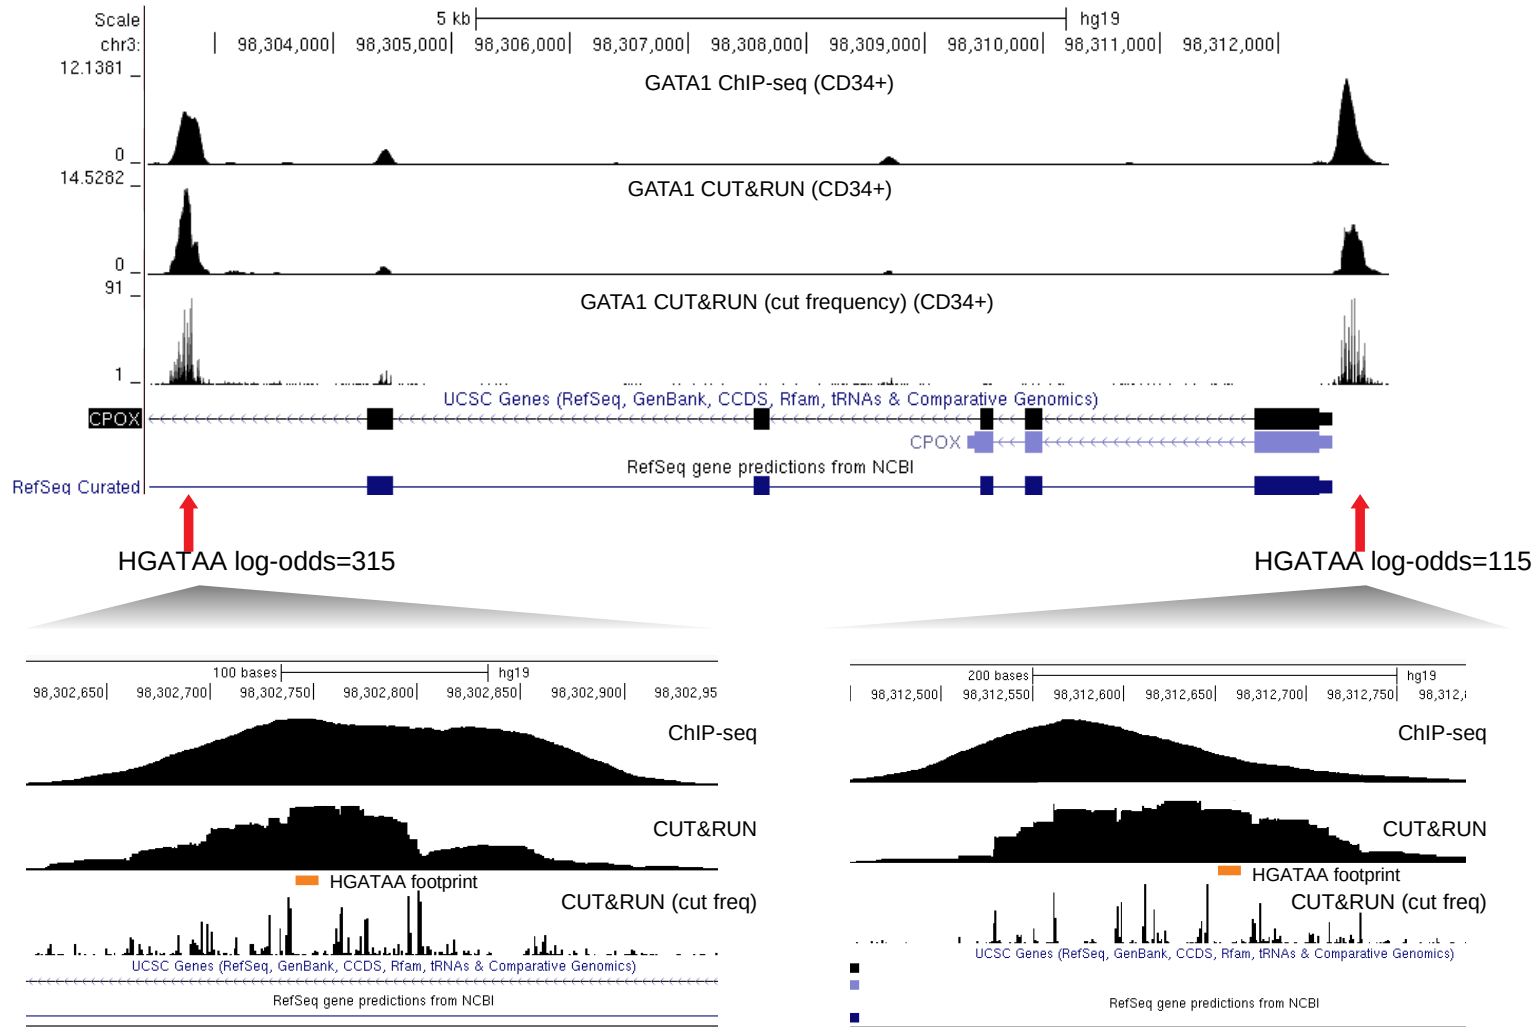

# Supplementary Fig 3

peak1 peak2

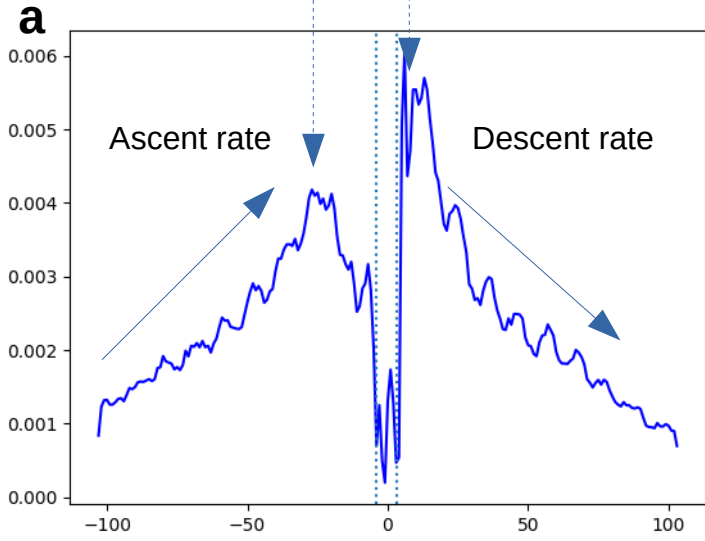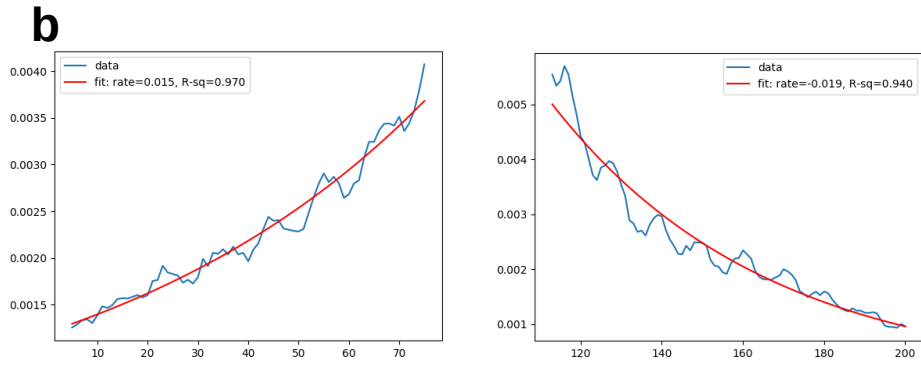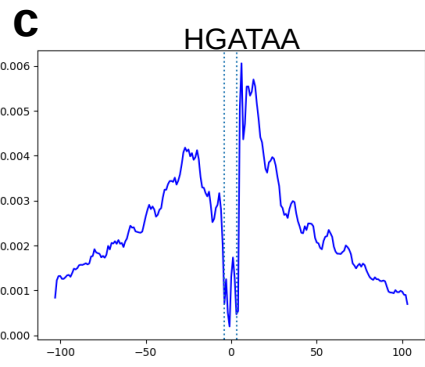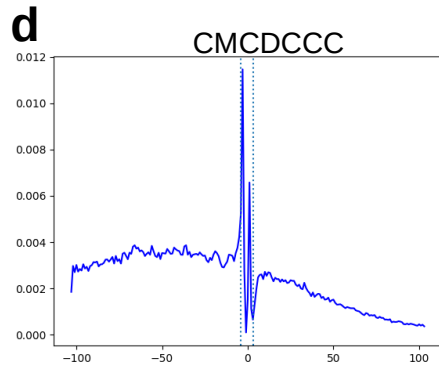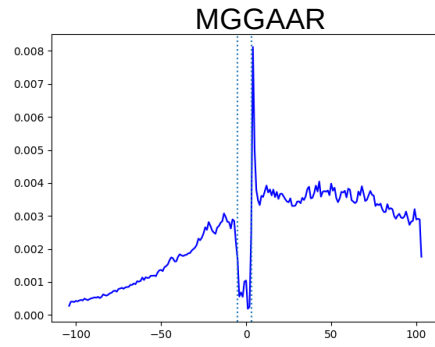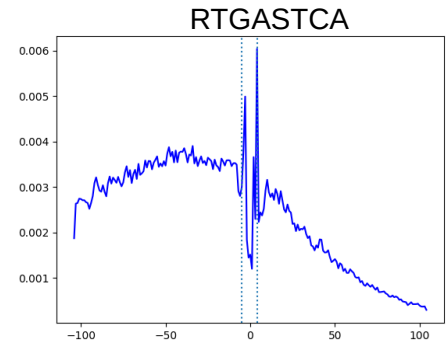

# Supplementary Fig 4

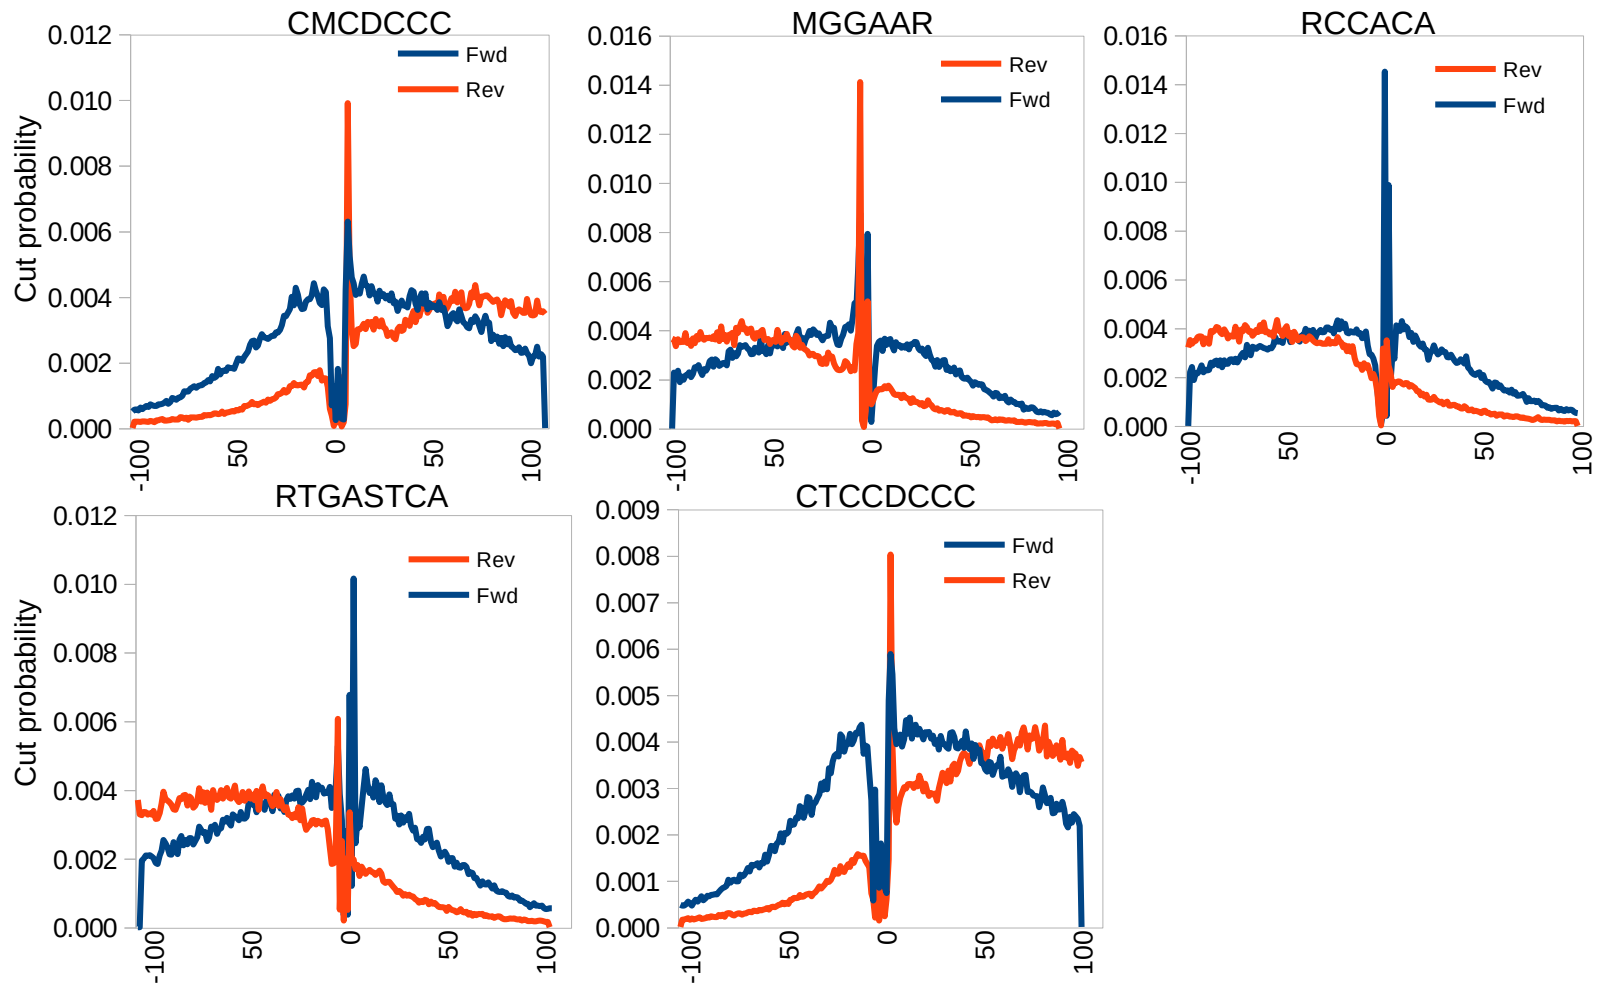

# Supplementary Fig 5

## GATA1-TAL1 composite

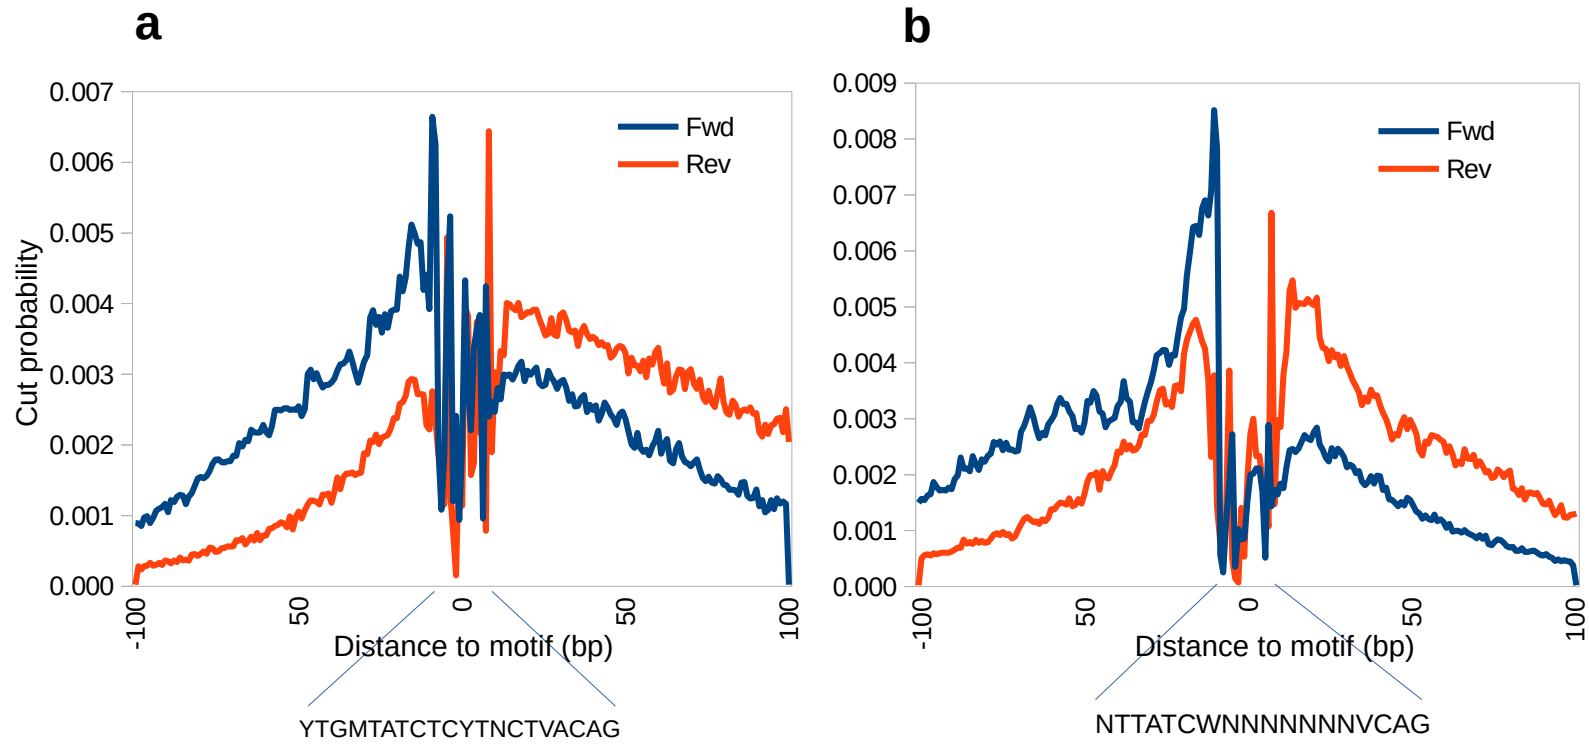

Supplementary Fig 6

**a**

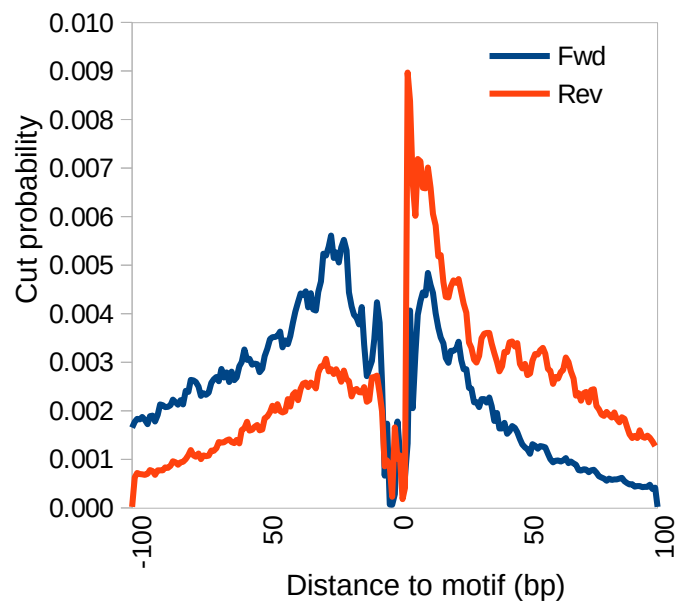

**b**

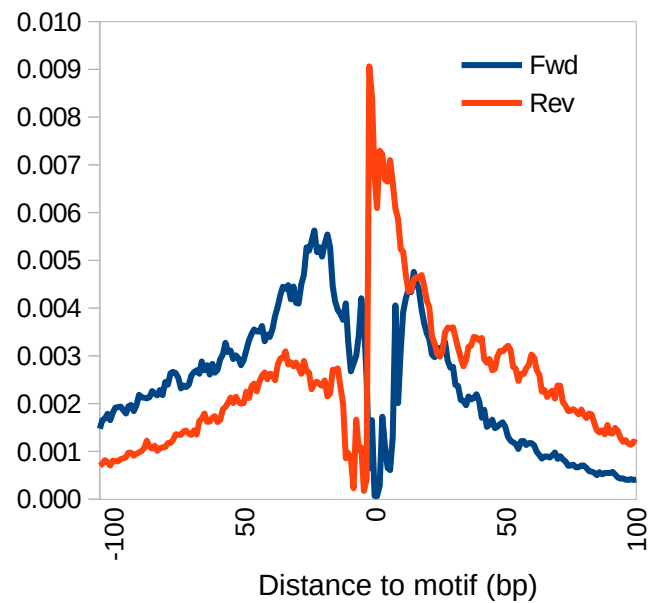

**c**

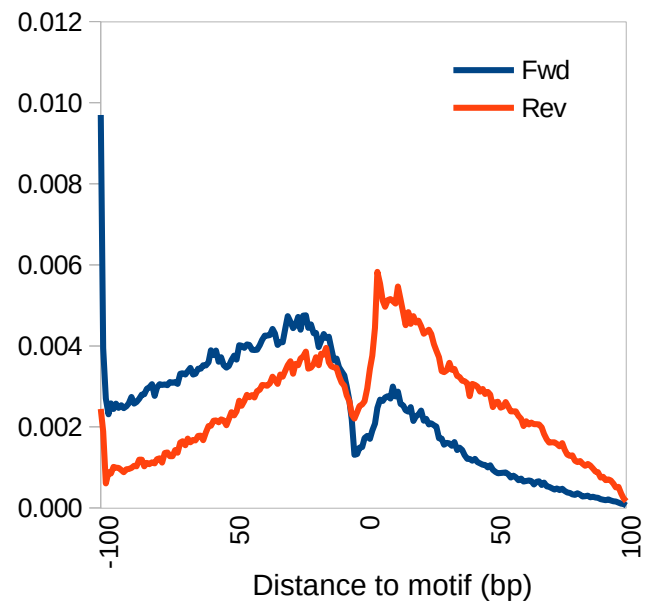

# Supplementary Fig 7

**a** Chr1:32510-32516. HGATAA on (-) strand

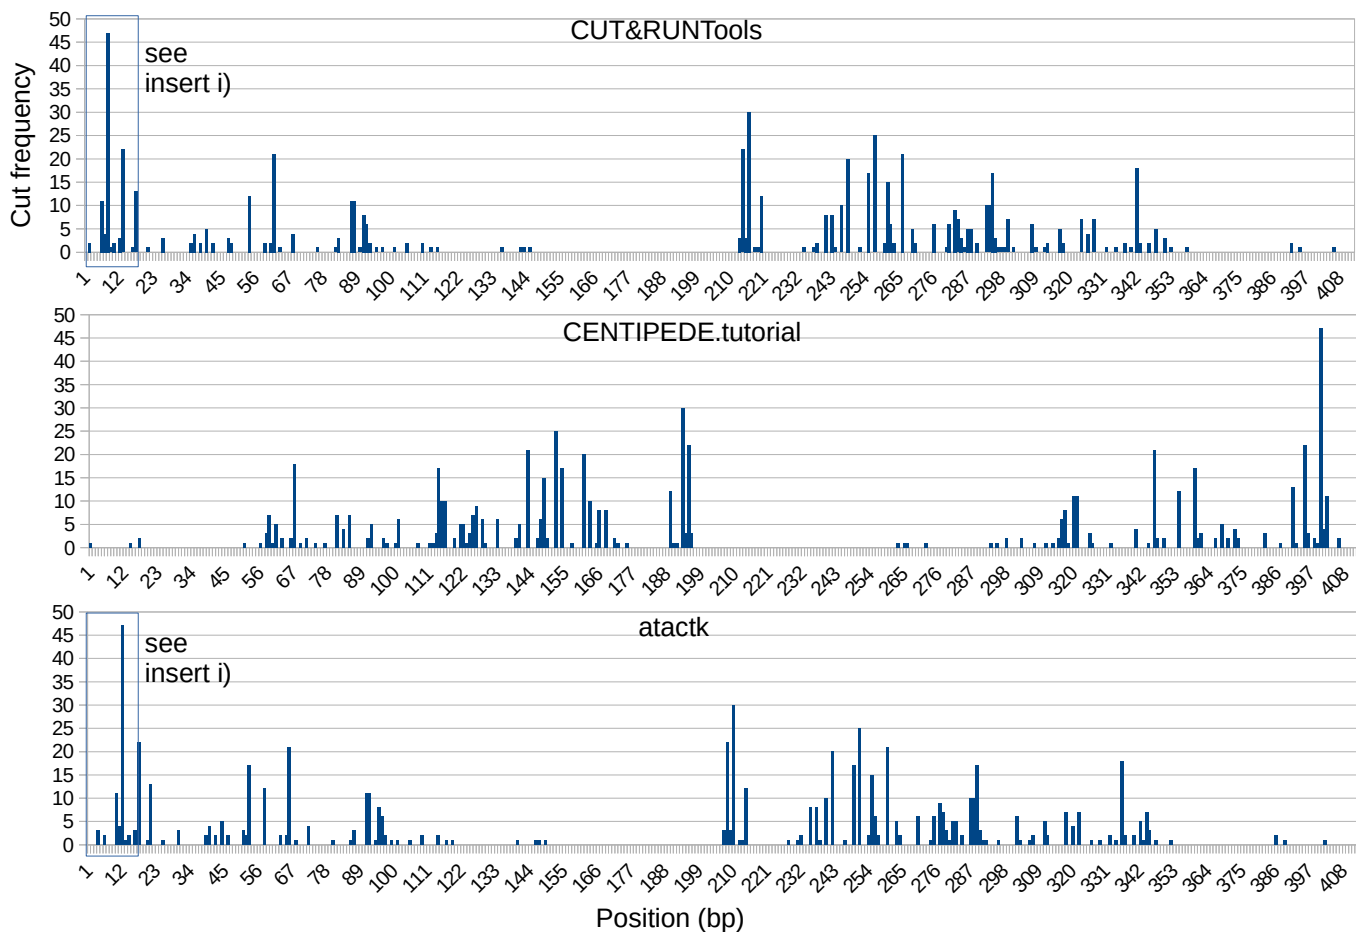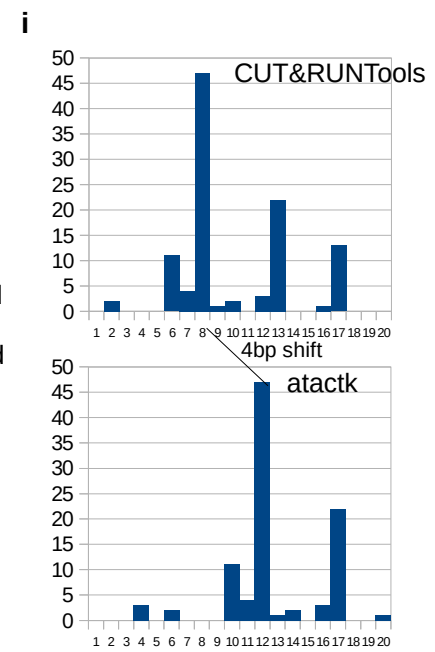

**b**

Chr1:32592-32598. HGATAA on (+) strand

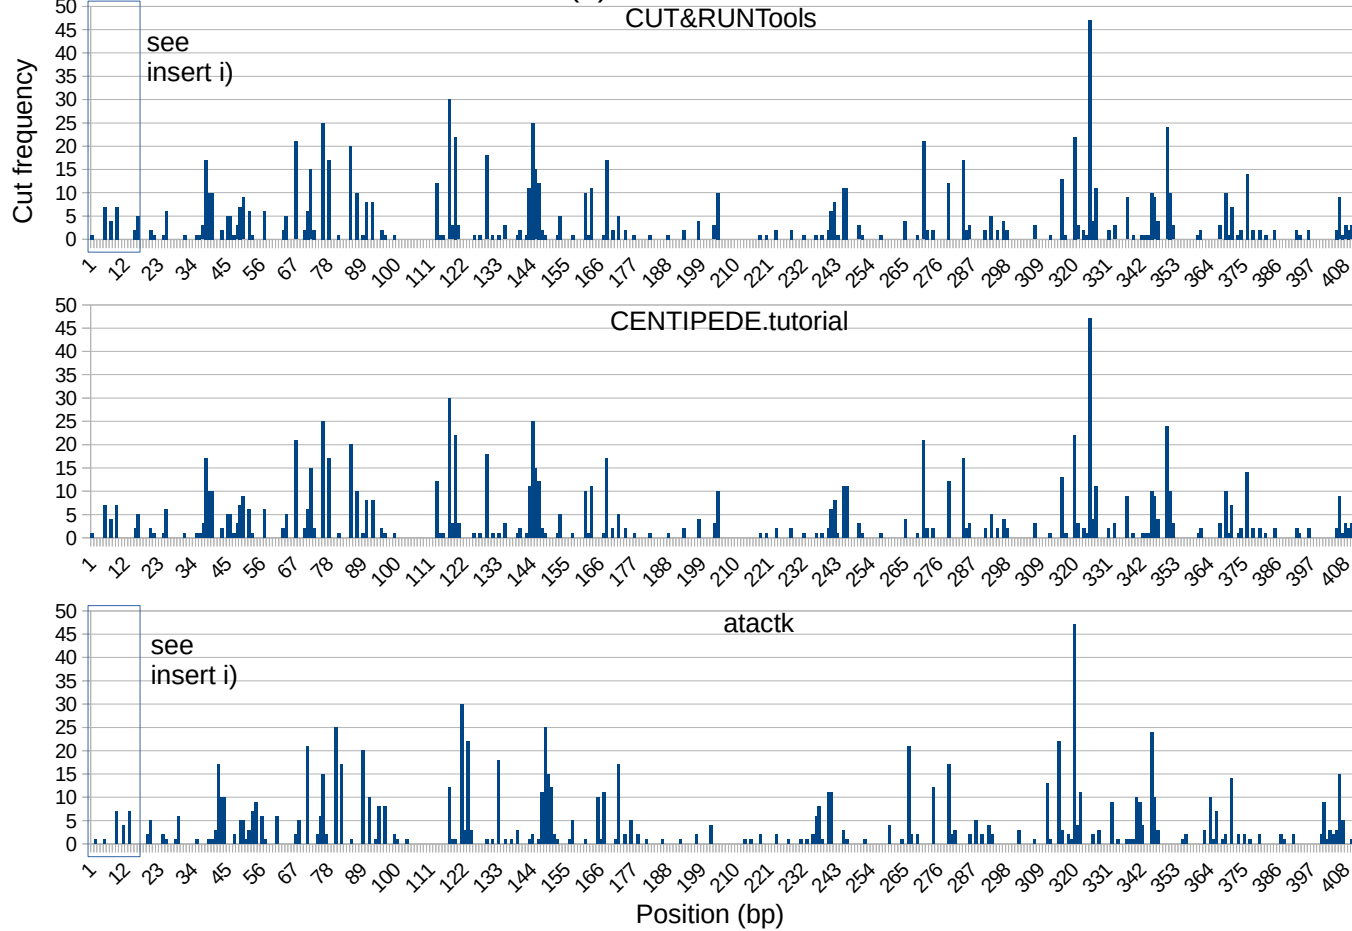**i**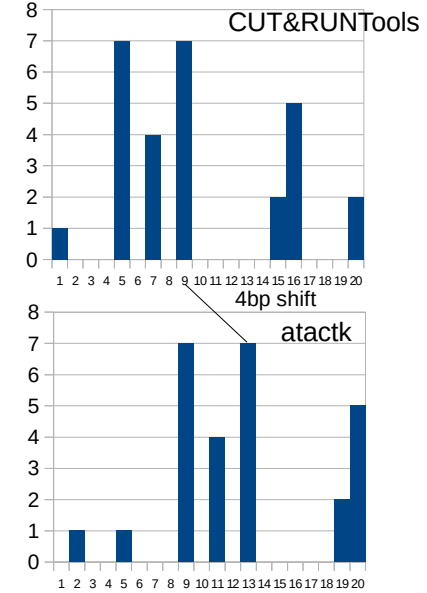



# Supplementary Fig 8

## Anatomy of DNA fragment

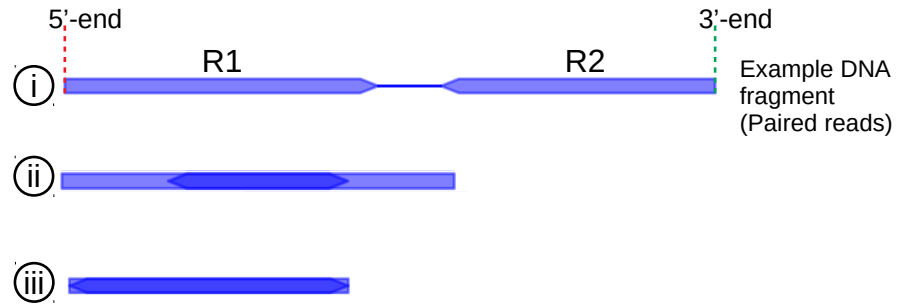

# Supplementary Fig 9

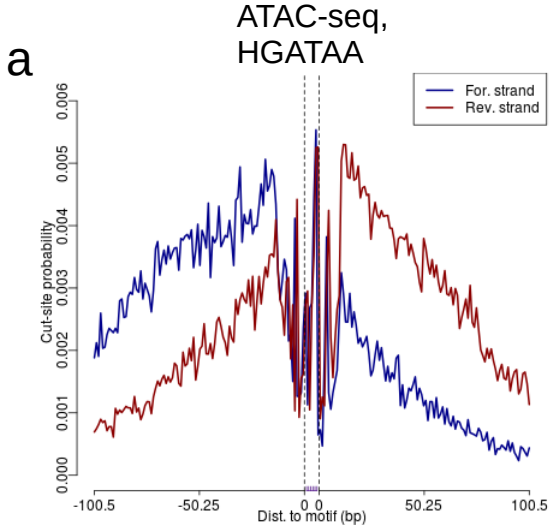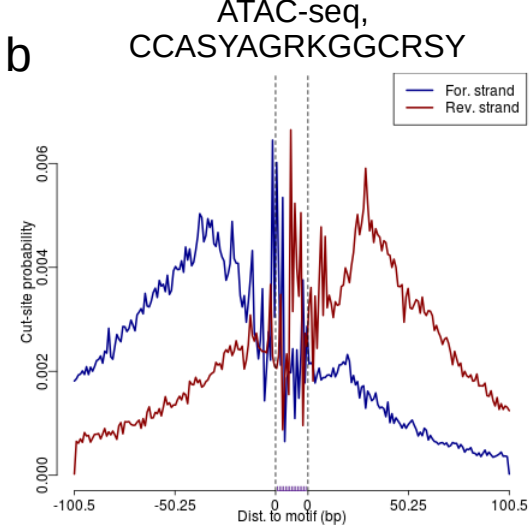

# Supplementary Fig 10

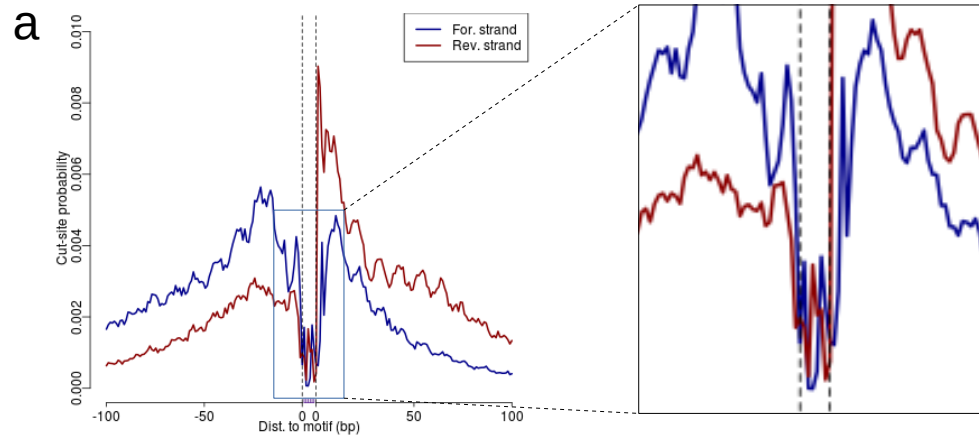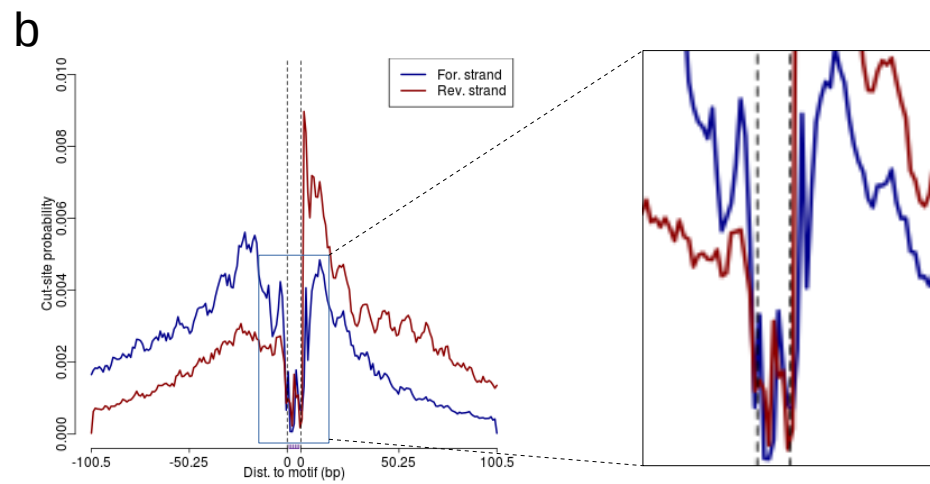

Supplementary Table 1: improvement of reads utilization by custom trimming, dovetail alignment

|              | Setting                     | Number of reads | Aligned concordantly 1 or more times |          | Total    | Alignment rate |
|--------------|-----------------------------|-----------------|--------------------------------------|----------|----------|----------------|
|              |                             |                 | 1 time                               | >1 times |          |                |
| CUT&RUNTools | default                     | 28787551        | 13070514                             | 15380579 | 28451093 | 0.9883         |
|              | no dovetail                 | 28787551        | 12804553                             | 15075315 | 27879868 | 0.9685         |
|              | no trimming                 | 31515085        | 11288822                             | 12932597 | 24221419 | 0.7686         |
|              | no trimming and no dovetail | 31515085        | 9003955                              | 11327689 | 20331644 | 0.6451         |

Supplementary Table 2: Binding log-odds\* for HGATAA motif from GATA1 CUT&RUN

| Chromosome | Start     | End       | Motif            | Orientation | Log-odds     |
|------------|-----------|-----------|------------------|-------------|--------------|
| chr1       | 206084286 | 206084292 | 1-HGATAA-1-chr1  | 31.5 -      | 539.94350133 |
| chr3       | 128775880 | 128775886 | 1-HGATAA-1-chr3  | 34.5 +      | 539.53606379 |
| chr19      | 51161579  | 51161585  | 1-HGATAA-2-chr19 | 34.5 +      | 538.99925407 |
| chr15      | 66097635  | 66097641  | 1-HGATAA-3-chr15 | 31.5 +      | 538.70591937 |
| chr15      | 66097669  | 66097675  | 1-HGATAA-1-chr15 | 34.5 -      | 526.8836613  |
| chr21      | 46831592  | 46831598  | 1-HGATAA-3-chr21 | 30 -        | 511.70845847 |
| chr9       | 135674727 | 135674733 | 1-HGATAA-1-chr9  | 34.5 +      | 488.71658446 |
| chr14      | 103844534 | 103844540 | 1-HGATAA-1-chr14 | 34.5 -      | 483.96802505 |
| chr4       | 154001237 | 154001243 | 1-HGATAA-1-chr4  | 34.5 -      | 445.57355961 |
| chr17      | 40781892  | 40781898  | 1-HGATAA-1-chr17 | 34.5 +      | 421.86582392 |
| chr8       | 21721189  | 21721195  | 1-HGATAA-2-chr8  | 31.5 +      | 407.023727   |
| chr20      | 4173122   | 4173128   | 1-HGATAA-2-chr20 | 31.5 +      | 404.41183257 |
| chr15      | 31270710  | 31270716  | 1-HGATAA-2-chr15 | 34.5 +      | 402.57658532 |
| chr4       | 144924560 | 144924566 | 1-HGATAA-2-chr4  | 31.5 -      | 401.80075706 |
| chr12      | 122309495 | 122309501 | 1-HGATAA-2-chr12 | 31.5 -      | 396.81915852 |
| chr17      | 31224658  | 31224664  | 1-HGATAA-1-chr17 | 34.5 +      | 386.97191045 |
| chr4       | 144806254 | 144806260 | 1-HGATAA-2-chr4  | 31.5 -      | 377.69801447 |
| chr17      | 17155717  | 17155723  | 1-HGATAA-2-chr17 | 34.5 +      | 369.99541714 |
| chr3       | 42878291  | 42878297  | 1-HGATAA-2-chr3  | 34.5 +      | 369.53921139 |
| chr14      | 31529077  | 31529083  | 1-HGATAA-2-chr14 | 34.5 +      | 359.84514632 |
| chr6       | 4177295   | 4177301   | 1-HGATAA-1-chr6  | 34.5 -      | 352.63599767 |
| chr3       | 158461534 | 158461540 | 1-HGATAA-2-chr3  | 31.5 -      | 352.23946823 |
| chr14      | 23366729  | 23366735  | 1-HGATAA-1-chr14 | 34.5 +      | 348.54592287 |
| chr2       | 182170724 | 182170730 | 1-HGATAA-2-chr2  | 31.5 +      | 347.54053257 |
| chr8       | 131355530 | 131355536 | 1-HGATAA-1-chr8  | 31.5 +      | 346.2938888  |
| chr11      | 12222906  | 12222912  | 1-HGATAA-2-chr11 | 31.5 +      | 344.54880589 |
| chr12      | 47601134  | 47601140  | 1-HGATAA-1-chr12 | 34.5 +      | 344.39714697 |
| chr2       | 106002546 | 106002552 | 1-HGATAA-1-chr2  | 34.5 +      | 331.66061495 |
| chr1       | 179016337 | 179016343 | 1-HGATAA-1-chr1  | 34.5 +      | 327.47086225 |
| chr19      | 51161526  | 51161532  | 1-HGATAA-1-chr19 | 34.5 +      | 326.16855012 |
| chr11      | 10764567  | 10764573  | 1-HGATAA-2-chr11 | 31.5 +      | 324.70144216 |
| chr4       | 154001272 | 154001278 | 1-HGATAA-2-chr4  | 31.5 -      | 324.58530837 |
| chr17      | 35085016  | 35085022  | 1-HGATAA-3-chr17 | 34.5 +      | 323.51680601 |
| chr11      | 5297187   | 5297193   | 1-HGATAA-1-chr11 | 34.5 +      | 322.13082367 |
| chr6       | 10750100  | 10750106  | 1-HGATAA-1-chr6  | 34.5 -      | 321.63525671 |
| chr16      | 21548326  | 21548332  | 1-HGATAA-2-chr16 | 31.5 +      | 319.85751909 |
| chr12      | 116635110 | 116635116 | 1-HGATAA-1-chr12 | 34.5 -      | 318.83571936 |
| chr14      | 65510005  | 65510011  | 1-HGATAA-1-chr14 | 34.5 +      | 318.63418452 |
| chr1       | 114457022 | 114457028 | 1-HGATAA-1-chr1  | 34.5 +      | 318.49413784 |
| chr3       | 98302746  | 98302752  | 1-HGATAA-1-chr3  | 34.5 +      | 315.45546771 |
| chr10      | 30726160  | 30726166  | 1-HGATAA-1-chr10 | 34.5 +      | 311.750006   |
| chr3       | 38765774  | 38765780  | 1-HGATAA-3-chr3  | 31.5 +      | 311.39122098 |
| chr2       | 7162991   | 7162997   | 1-HGATAA-2-chr2  | 31.5 -      | 308.06039247 |
| chr11      | 72767188  | 72767194  | 1-HGATAA-1-chr11 | 34.5 -      | 307.06930345 |
| chr12      | 122309544 | 122309550 | 1-HGATAA-1-chr12 | 34.5 -      | 302.48306998 |
| chr1       | 160959833 | 160959839 | 1-HGATAA-1-chr1  | 34.5 -      | 301.71039986 |
| chr3       | 46550819  | 46550825  | 1-HGATAA-1-chr3  | 34.5 +      | 298.31930536 |
| chr6       | 42060095  | 42060101  | 1-HGATAA-1-chr6  | 34.5 +      | 297.00240629 |
| chr2       | 69828488  | 69828494  | 1-HGATAA-1-chr2  | 34.5 +      | 296.53737507 |
| chr10      | 103210225 | 103210231 | 1-HGATAA-2-chr10 | 31.5 -      | 293.99385537 |

\* Top 50 sites with highest binding log odds are shown.

Supplementary Table 3: Footprint shape and symmetry analysis\* (GATA1 CUT&RUN)

| Motif                                 | Ascent rate (1) | R <sup>2</sup> (coefficient determination) | Peak1 position | Descent rate (2) | R <sup>2</sup> (coefficient determination) | Peak2 position | Footprint Symmetry Score | Δrates (1-2) |
|---------------------------------------|-----------------|--------------------------------------------|----------------|------------------|--------------------------------------------|----------------|--------------------------|--------------|
| DREME-16.BCTTATC                      | 0.017885        | 0.952077                                   | 91             | -0.015968        | 0.972970                                   | 129            | 0.032564                 | 0.001917     |
| DREME-1.HGATAA                        | 0.014891        | 0.969814                                   | 75             | -0.018961        | 0.940017                                   | 113            | 0.032266                 | 0.004070     |
| MEME-1.BBCTTATCTBH                    | 0.018207        | 0.941735                                   | 92             | -0.015034        | 0.972119                                   | 130            | 0.031761                 | 0.003173     |
| DREME-14.CTGATTRG                     | 0.022813        | 0.982532                                   | 77             | -0.007001        | 0.929999                                   | 114            | 0.028925                 | 0.015812     |
| MEME-50.GGATAAGCACCC                  | 0.007829        | 0.937589                                   | 80             | -0.021961        | 0.967465                                   | 113            | 0.028587                 | 0.014132     |
| DREME-7.AGATTA                        | 0.006539        | 0.801149                                   | 76             | -0.023579        | 0.967788                                   | 113            | 0.028058                 | 0.017040     |
| DREME-12.CTGATAKS                     | 0.008038        | 0.932221                                   | 76             | -0.020616        | 0.984048                                   | 110            | 0.027780                 | 0.012578     |
| MEME-5.TYATTCRKCTCRGSWWGRTGASTCAGRGCC | 0.006759        | 0.887717                                   | 75             | -0.021965        | 0.979954                                   | 132            | 0.027525                 | 0.015206     |
| DREME-19.AAAAAHAA                     | 0.025478        | 0.987155                                   | 93             | -0.004194        | 0.515339                                   | 173            | 0.027312                 | 0.021285     |
| DREME-9.CTCCDCCC                      | 0.024397        | 0.990011                                   | 90             | -0.003625        | 0.693915                                   | 145            | 0.026668                 | 0.020771     |
| DREME-6.RTGASTCA                      | 0.005535        | 0.836229                                   | 62             | -0.022152        | 0.984747                                   | 113            | 0.026443                 | 0.016618     |
| MEME-8.CGCCCCCGC                      | 0.023271        | 0.983471                                   | 93             | -0.004910        | 0.705149                                   | 147            | 0.026348                 | 0.018361     |
| MEME-37.TCCTGCTSTKG                   | 0.023555        | 0.979295                                   | 91             | -0.003879        | 0.823788                                   | 139            | 0.026263                 | 0.019676     |
| MEME-32.RCTGCCMTCTYVTGS               | 0.021665        | 0.973954                                   | 93             | -0.005579        | 0.898509                                   | 142            | 0.026114                 | 0.016086     |
| MEME-20.GCTRYSAAGTGBAGAGAMCA          | 0.005315        | 0.874646                                   | 78             | -0.021758        | 0.979390                                   | 122            | 0.025958                 | 0.016442     |
| MEME-33.CCCAGGCGTGG                   | 0.005168        | 0.805398                                   | 59             | -0.022106        | 0.984650                                   | 114            | 0.025930                 | 0.016938     |
| DREME-2.CMCDCCC                       | 0.022766        | 0.984864                                   | 90             | -0.004861        | 0.719514                                   | 145            | 0.025919                 | 0.017905     |
| DREME-8.CAGMWG                        | 0.004109        | 0.834260                                   | 74             | -0.022751        | 0.975606                                   | 112            | 0.025624                 | 0.018642     |
| MEME-29.TWKCWRNMASCCRSCACASAG         | 0.005768        | 0.905974                                   | 83             | -0.020632        | 0.981285                                   | 124            | 0.025472                 | 0.014864     |
| MEME-30.TMTATCTSTGTDCTCTTGKC          | 0.006531        | 0.922546                                   | 89             | -0.019674        | 0.972762                                   | 122            | 0.025163                 | 0.013143     |
| MEME-3.GAKGKRRTCAGASNCTGGRCTGAGWGAAG  | 0.004464        | 0.791282                                   | 95             | -0.021919        | 0.984111                                   | 132            | 0.025103                 | 0.017455     |
| MEME-15.GCWCTGCCTCC                   | 0.003754        | 0.740657                                   | 65             | -0.024095        | 0.913687                                   | 112            | 0.024796                 | 0.020341     |
| DREME-17.CCWCCTCC                     | 0.024659        | 0.990057                                   | 88             | -0.001191        | 0.181527                                   | 110            | 0.024630                 | 0.023469     |
| MEME-47.CAGCCCCACCC                   | 0.023026        | 0.985668                                   | 93             | -0.002392        | 0.518524                                   | 120            | 0.023936                 | 0.020634     |
| DREME-10.CHGCC                        | 0.004036        | 0.700540                                   | 70             | -0.021109        | 0.982761                                   | 109            | 0.023572                 | 0.017073     |
| MEME-35.CATCWCAGCCA                   | 0.003658        | 0.715174                                   | 78             | -0.021315        | 0.982304                                   | 112            | 0.023554                 | 0.017657     |
| MEME-2.GCCCCGCCCTC                    | 0.022955        | 0.988390                                   | 95             | -0.002275        | 0.327758                                   | 110            | 0.023434                 | 0.020680     |
| DREME-11.AMACAS                       | 0.004115        | 0.711195                                   | 55             | -0.021011        | 0.974483                                   | 111            | 0.023402                 | 0.016897     |
| DREME-18.CWGTSAC                      | 0.004215        | 0.750771                                   | 64             | -0.020574        | 0.963616                                   | 109            | 0.022989                 | 0.016359     |
| DREME-5.RCCACA                        | 0.003010        | 0.662202                                   | 79             | -0.020842        | 0.982252                                   | 110            | 0.022465                 | 0.017831     |
| DREME-20.AGGCGTGK                     | 0.020585        | 0.978716                                   | 96             | -0.003452        | 0.656984                                   | 126            | 0.022415                 | 0.017133     |
| DREME-4.MGGAAR                        | 0.001027        | 0.116794                                   | 96             | -0.020259        | 0.967402                                   | 113            | 0.019719                 | 0.019232     |
| MEME-34.GVCMCAGAGG                    | 0.001975        | 0.280822                                   | 96             | -0.019529        | 0.955259                                   | 114            | 0.019210                 | 0.017554     |

\* For each footprint, we fit the data with  $A \exp(B * x)$ . Ascent rate refers to the parameter B estimated on the left arm of the footprint. Descent rate refers to the parameter B estimated on the right arm of the footprint. See **Supplementary Fig 3**.

Supplementary Data 1: Summary of motifs found for GATA1 CUT&RUN  
(based on a subset of 5000 peaks)

| MOTIF_INDEX | MOTIF_SOURCE | MOTIF_ID                       | FACTOR     | ALT_ID   | WIDTH | SITES | E-VALUE   |
|-------------|--------------|--------------------------------|------------|----------|-------|-------|-----------|
| 1           | DREME        | HGATAA                         | GATA1      | DREME-1  | 6     | 7321  | 1.1e-1163 |
| 2           | MEME         | BBCTTATCTBH                    | GATA1      | MEME-1   | 11    | 344   | 2.6e-1082 |
| 3           | DREME        | AGATA                          | GATA1      | DREME-3  | 5     | 2771  | 6.9e-688  |
| 4           | DREME        | BCTTATC                        | GATA1      | DREME-16 | 7     | 176   | 7.9e-676  |
| 5           | DREME        | CMCDCCC                        | KLF1       | DREME-2  | 7     | 2014  | 5.9E-94   |
| 6           | DREME        | AGATTA                         |            | DREME-7  | 6     | 1064  | 1.1E-86   |
| 7           | DREME        | CTGATAKS                       | GATA1      | DREME-12 | 8     | 250   | 5.2E-58   |
| 8           | DREME        | MGGAAR                         | ETS1, FLI1 | DREME-4  | 6     | 2923  | 1.5E-41   |
| 9           | DREME        | CAGMWG                         |            | DREME-8  | 6     | 3901  | 2.7E-40   |
| 10          | DREME        | RTGASTCA                       | NFE2       | DREME-6  | 8     | 433   | 6.3E-35   |
| 11          | DREME        | RCCACA                         | RUNX1      | DREME-5  | 6     | 1706  | 4.5E-33   |
| 12          | DREME        | CHGCC                          |            | DREME-10 | 5     | 6795  | 3E-29     |
| 13          | DREME        | CTGATTRG                       |            | DREME-14 | 8     | 173   | 2.4E-26   |
| 14          | MEME         | GGATAAGCACC                    |            | MEME-50  | 11    | 4     | 1.30E-24  |
| 15          | MEME         | YTGMTATCTCYTNCTVACAG           | GATA1/TAL1 | MEME-12  | 20    | 20    | 5.80E-24  |
| 16          | DREME        | CTCCDCCC                       | KLF1       | DREME-9  | 8     | 411   | 3E-21     |
| 17          | DREME        | AMACAS                         |            | DREME-11 | 6     | 2359  | 4.4E-16   |
| 18          | DREME        | CWGTSAC                        | PBX3/MEIS  | DREME-18 | 7     | 512   | 4.3E-13   |
| 19          | MEME         | TMTATCTSTGTDCTSCCTTGKC         |            | MEME-30  | 21    | 8     | 1.8E-11   |
| 20          | DREME        | RGAAA                          |            | DREME-13 | 5     | 4901  | 8.5E-11   |
| 21          | MEME         | RCTGCCMTCTYVTGS                |            | MEME-32  | 15    | 13    | 9.1E-11   |
| 22          | MEME         | GCCCCGCCCTC                    |            | MEME-2   | 11    | 36    | 3.1E-08   |
| 23          | DREME        | ACGT                           |            | DREME-15 | 4     | 909   | 5.9E-08   |
| 24          | MEME         | CATCWCAGCCA                    | GF1B       | MEME-35  | 11    | 11    | 6.4E-06   |
| 25          | MEME         | GCTRYAGTGABAGAGAMCA            | ZBTB3      | MEME-20  | 20    | 10    | 1.7E-05   |
| 26          | DREME        | CCWCCTCC                       |            | DREME-17 | 8     | 154   | 1.9E-05   |
| 27          | MEME         | TWKCWRNMASCCRSCACASAG          |            | MEME-29  | 21    | 11    | 3.3E-05   |
| 28          | MEME         | GGVCMCAGAGG                    |            | MEME-34  | 11    | 9     | 7.5E-05   |
| 29          | MEME         | TYATTCKKCTCRGSWWGRTGASTCAGRGCC |            | MEME-5   | 30    | 3     | 0.00017   |
| 30          | DREME        | AGGCGTGK                       |            | DREME-20 | 8     | 52    | 0.00052   |
| 31          | MEME         | CCCAGGCGTGG                    |            | MEME-33  | 11    | 2     | 0.0011    |
| 32          | DREME        | AAAAHAA                        |            | DREME-19 | 8     | 240   | 0.0016    |
| 33          | MEME         | CAGCCCCACCC                    |            | MEME-47  | 11    | 2     | 0.0022    |
| 34          | MEME         | CGGCCCGC                       |            | MEME-8   | 9     | 2     | 0.013     |
| 35          | MEME         | GAKGKRRTCAGASNCTGGRCTGAGWGAAG  |            | MEME-3   | 29    | 7     | 0.02      |
| 36          | MEME         | TCCTGCTSTKG                    | ZIC1/2     | MEME-37  | 11    | 11    | 0.026     |
| 37          | MEME         | GCWCTGCCTCC                    |            | MEME-15  | 11    | 37    | 0.029     |
